# Supplementary material for: Comparison of Medical Research Abstracts Written by Surgical Trainees and Senior Surgeons or Generated by Large Language Models
Source: PubMed Central journal article supplement (PMC11297395; doi:10.1001/jamanetworkopen.2024.25373), 2024-08-02
Supplement: jamanetwopen-e2425373-s002.pdf [file jamanetwopen-e2425373-s002.pdf]

## Data Sharing Statement

Holland. Comparison of Medical Research Abstracts Written by Surgical Trainees and Senior Surgeons or Generated by Large Language Models. *JAMA Netw Open*. Published August 02, 2024. doi:10.1001/jamanetworkopen.2024.25373

### Data

**Data available:** No
